# Supplementary material for: Prevention of type 2 diabetes mellitus with acupuncture: Protocol for a systematic review and meta-analysis
Source: PubMed Central journal article supplement (PMC6283081; doi:10.1097/md.0000000000013355), 2018-11-30
Supplement: medi-97-e13355-s001.pdf [file medi-97-e13355-s001.pdf]

# **Prevention of type 2 diabetes mellitus with acupuncture: protocol for a systematic review and meta-analysis**

Relevant studies will be obtained from English database CENTRAL, PubMed, EMBASE, clinical trials; Chinese Database of Chinese National Knowledge Infrastructure Database (CNKI), Chinese Biomedical Literature Database (CBM), Chinese Scientific Journal Database (VIP), Wan Fang Database.

## Search Strategy for PubMed

- #1 acupuncture [mh]
- #2 acupuncture therapy [all fields]
- #3 acupuncture treatment [all fields]
- #4 acupoints [mh]
- #5 acupuncture points [all fields]
- #6 electroacupuncture [mh]
- #7 ear acupuncture [mh]
- #8 auricular acupuncture [all fields]
- #9 scalp acupuncture [all fields]
- #10 fire needling [all fields]
- #11 plum blossom needle [all fields]
- #12 elongated needle [all fields]
- #13 intradermal needling [all fields]
- #14 dermal needling [all fields]
- #15 dry needling [all fields]
- #16 manual acupuncture [all fields]
- #17 body acupuncture [all fields]
- #18 #1 or #2 or #3 or #4 or #5 or #6 or #7 or #8 or #9 or #10 or #11 or #12 or #13 or #14 or #15 or #16 or #17
- #19 prediabetes [mh]
- #20 impaired fasting glucose [mh]
- #21 IFG [all fields]
- #22 impaired glucose tolerance [mh]
- #23 IGT [all fields]
- #24 impaired glucose regulation [mh]
- #25 IGR [all fields]
- #26 diabetes [all fields]
- #27 prevention [all fields]
- #28 hyperglycemia [all fields]
- #29 normoglycemia [all fields]
- #30 #19 or #20 or #21 or #22 or #23 or #24 or #25 or #26 or #27 or #28 or #29
- #31 #18 and #30
- #32 randomized controlled trial [pt]
- #33 controlled clinical trial [pt]
- #34 randomized [tiab]

- #35 placebo [tiab]
- #36 drug therapy [sh]
- #37 randomly [tiab]
- #38 trial [tiab]
- #39 groups [tiab]
- #40 #32 or #33 or #34 or #35 or #36 or #37 or #38 or #39
- #41 animals [mh] not (humans [mh] and animals [mh])
- #42 #40 not #41
- #43 #31 and #42
